# Supplementary material
Source: PubMed Central journal article supplement (PMC7308009)
Supplement: mmc4.pdf [file mmc4.pdf]

# Survey of eye symptoms during the COVID epidemic, in the Nashville metro area

Please complete the survey below.

Thank you!

---

Age group of affected person

- 18-20
- 21-30
- 31-40
- 41-50
- 51-60
- 61-70
- 71-80
- 81+

---

Gender

- M
- F

---

Race

- White
- Black/African American
- Asian
- Other/Multiracial

---

Ethnicity

- Hispanic
- Non-Hispanic

---

Did you test positive for COVID 19?

- Yes
- No

---

Exposure (Check all that apply)

- Health care team
- Direct exposure to sick person at home/work
- Community spread/unknown
- N/A

---

Clinical course (Check all that apply)

- Hospitalized
- Recovered at home
- Wore mask and continued to work
- No change in behavior
- N/A

---

COVID like symptoms (Check all that apply)

- Cough
- Fever
- Shortness of breath/ difficulty breathing
- Muscle aches/weakness
- Diarrhea/abdominal pain
- Nausea/vomiting
- Headache
- Sore throat
- Loss of smell or taste
- Runny nose
- Other
- N/A

---

If other on Covid like symptoms please specify.

\_\_\_\_\_

---

Eye symptoms (Check all that apply)

- Red eyes
- Eye pain
- Excessive tearing
- Sensitivity to light
- Blurry vision
- Double vision
- Flashes/floaters
- Blind spots in vision
- Tunnel vision/Decrease in peripheral vision
- Flickering lights in vision
- Other
- N/A

---

If other on eye symptoms please specify.

\_\_\_\_\_

---

When were the eye symptoms noted? (Check all that apply)

- Before onset of systemic symptoms
- At the time of illness
- During recovery phase
- N/A

---

How long did eye symptoms last? (Check all that apply)

- Resolved
- Persistent despite recovery
- N/A

---

History of environmental allergy?

- Yes
- No

---

Allergic symptoms for environmental allergy (Check all that apply)

- red eyes
- runny nose
- fever
- itching
- skin rash
- other
- N/A

---

If other on allergic symptoms please specify.

\_\_\_\_\_

---

History of drug related allergy?

- Yes
- No

---

Allergic symptoms to drug related allergy (Check all that apply)

- red eyes
- runny nose
- fever
- itching
- skin rash
- other
- N/A

---

If other on allergic symptoms please specify.

\_\_\_\_\_

---

History of any allergies?

- Yes
- No

---

Please specify other allergy.

\_\_\_\_\_

---

Symptoms of other allergies (Check all that apply)

- red eyes
- runny nose
- fever
- itching
- skin rash
- other
- N/A

---

If other on symptoms please specify.

\_\_\_\_\_

---

Does the affected person have a regular eye care provider?

- Yes
- No

---

Please specify which eye care provider. (Check all that apply)

- For glasses/contact lens only
- For eye disease monitoring/treatment such as diabetes, glaucoma, macular degeneration, uveitis, etc

---

Does the affected person have an underlying chronic health condition such as Diabetes, HTN, asthma, heart disease and is actively receiving medication for that condition?

- Yes
- No

---

Please list underlying chronic health care conditions:

\_\_\_\_\_

---

Did you receive any medical treatment for COVID ?

- Yes
- No

---

Please list medical treatment for Covid:

\_\_\_\_\_

---

Did you receive any treatment for your eye symptoms?

- Yes
- No

---

Please list any eye treatment received:

\_\_\_\_\_
